# Supplementary material for: Local Backbone Geometry Plays a Critical Role in Determining Conformational Preferences of Amino Acid Residues in Proteins
Source: MDPI journal article supplement (doi:10.3390/biom12091184), 2022-08-26
Supplement: s1 [file s1]

## Supplementary Material

**Table S1.** PDB codes and some experimental parameters (chain length, resolution, R-factor) of the protein chains of the datasets Data2.2 (a) and Data1.6 (b).

Excel file TableS1.xls

**Table S2.** List of PDB codes of Data2.2 (a) and Data1.6 (b).

Excel file TableS2.xls

**Table S3.** Populations of the ( $\varphi, \psi$ ) boxes containing at least 1000 residues in the dataset Data2.2. For each box, the number of residues in  $\alpha$ -helix (H), 3(10)-helix (G),  $\beta$ -sheet (E), and polyproline II (P)) is also indicated. The total number of residues in Data2.2 is 1,089,468 (265,543 in E; 13,297 in P; 42,006 in G; 376,101 in H).

| BOX | tot    | E      | P     | G  | H |
|-----|--------|--------|-------|----|---|
| 1A  | 2,218  | 1,150  |       |    |   |
| 2A  | 6,348  | 3,550  |       |    |   |
| 3A  | 5,842  | 3,197  |       |    |   |
| 4A  | 5,010  | 2,478  | 1     |    |   |
| 5A  | 2,903  | 921    | 34    |    |   |
| 6A  | 3,019  | 529    | 129   |    |   |
| 7A  | 6,009  | 534    | 376   | 1  |   |
| 8A  | 3,939  | 219    | 393   | 3  | 4 |
| 1B  | 2,025  | 1,179  |       |    |   |
| 2B  | 11,185 | 7,597  |       |    |   |
| 3B  | 16,369 | 11,450 |       |    |   |
| 4B  | 16,989 | 11,318 | 3     |    |   |
| 5B  | 9,086  | 4,856  | 129   |    |   |
| 6B  | 6,545  | 2,215  | 363   |    | 1 |
| 7B  | 11,205 | 1,979  | 1,062 | 6  | 1 |
| 8B  | 17,984 | 1,647  | 2,097 | 33 | 9 |
| 9B  | 2,421  | 147    | 301   | 12 | 6 |
| 2C  | 6,144  | 4,216  |       |    |   |
| 3C  | 14,815 | 11,667 |       |    |   |

|     |        |        |       |     |    |
|-----|--------|--------|-------|-----|----|
| 4C  | 22,848 | 18,478 |       |     |    |
| 5C  | 17,728 | 13,685 | 136   |     |    |
| 6C  | 12,066 | 7,707  | 401   |     |    |
| 7C  | 13,619 | 5,711  | 880   | 5   |    |
| 8C  | 26,372 | 5,590  | 2,359 | 37  | 2  |
| 9C  | 12,919 | 1,327  | 1,077 | 89  | 12 |
| 2D  | 2,340  | 1,381  |       |     |    |
| 3D  | 8,739  | 6,842  |       |     |    |
| 4D  | 24,673 | 21,355 | 3     |     |    |
| 5D  | 27,966 | 23,978 | 127   |     | 1  |
| 6D  | 19,972 | 15,234 | 418   | 2   | 2  |
| 7D  | 15,980 | 8,848  | 691   | 4   |    |
| 8D  | 16,345 | 4,770  | 1,029 | 57  | 1  |
| 9D  | 10,044 | 936    | 552   | 150 | 3  |
| 3E  | 2,814  | 1,736  |       |     |    |
| 4E  | 8,639  | 6,689  |       |     | 1  |
| 5E  | 13,200 | 10,223 | 84    |     |    |
| 6E  | 12,101 | 8,147  | 196   |     | 2  |
| 7E  | 8,618  | 4,300  | 249   | 2   |    |
| 8E  | 2,771  | 751    | 100   | 10  | 1  |
| 3F  | 1,195  | 501    |       |     |    |
| 4F  | 2,602  | 1,288  |       |     |    |
| 5F  | 3,678  | 1,920  | 5     |     |    |
| 6F  | 3,744  | 1,844  | 11    |     |    |
| 7F  | 3,110  | 1,155  | 10    |     | 2  |
| 4G  | 1,858  | 394    |       | 1   |    |
| 6G  | 1,129  | 257    |       |     |    |
| 7G  | 2,246  | 296    |       |     | 1  |
| 4H  | 1,726  | 128    |       | 9   |    |
| 7H  | 2,480  | 93     |       | 2   |    |
| 16I | 4,125  | 333    |       | 46  | 43 |
| 4J  | 1,256  | 42     |       | 116 | 12 |
| 5J  | 1,010  | 33     |       | 69  |    |

|            |         |     |       |         |
|------------|---------|-----|-------|---------|
| <b>16J</b> | 5,725   | 188 | 291   | 29      |
| <b>17J</b> | 2,851   | 115 | 34    | 16      |
| <b>4K</b>  | 2,204   | 41  | 282   | 68      |
| <b>5K</b>  | 4,524   | 66  | 659   | 37      |
| <b>6K</b>  | 3,355   | 39  | 378   | 6       |
| <b>16K</b> | 1,220   | 15  | 188   | 1       |
| <b>17K</b> | 4,884   | 56  | 221   | 13      |
| <b>18K</b> | 2,234   | 21  | 21    | 1       |
| <b>4L</b>  | 2,311   | 82  | 140   | 303     |
| <b>5L</b>  | 6,632   | 142 | 1,251 | 578     |
| <b>6L</b>  | 12,812  | 144 | 2,133 | 555     |
| <b>7L</b>  | 6,282   | 62  | 987   | 94      |
| <b>17L</b> | 2,453   | 15  | 144   | 2       |
| <b>18L</b> | 4,666   | 45  | 94    | 7       |
| <b>19L</b> | 1,796   | 16  | 17    |         |
| <b>4M</b>  | 2,047   | 208 | 4     | 562     |
| <b>5M</b>  | 5,003   | 526 | 302   | 1,258   |
| <b>6M</b>  | 10,799  | 299 | 1,965 | 2,079   |
| <b>7M</b>  | 18,634  | 173 | 3,446 | 2,744   |
| <b>8M</b>  | 12,067  | 77  | 4,495 | 1,090   |
| <b>18M</b> | 2,860   | 26  | 31    |         |
| <b>19M</b> | 2,455   | 21  | 26    |         |
| <b>4N</b>  | 1,196   | 110 |       | 317     |
| <b>5N</b>  | 3,488   | 552 | 4     | 1,069   |
| <b>6N</b>  | 5,704   | 619 | 105   | 1,994   |
| <b>7N</b>  | 13,278  | 414 | 868   | 5,522   |
| <b>8N</b>  | 44,922  | 208 | 9,870 | 19,811  |
| <b>9N</b>  | 9,033   | 30  | 3,431 | 2,204   |
| <b>5O</b>  | 1,696   | 295 |       | 310     |
| <b>6O</b>  | 3,671   | 732 |       | 1,236   |
| <b>7O</b>  | 11,043  | 732 | 19    | 7,171   |
| <b>8O</b>  | 183,473 | 506 | 1,692 | 172,636 |
| <b>9O</b>  | 63,823  | 113 | 6,009 | 51,149  |

|           |        |     |     |        |
|-----------|--------|-----|-----|--------|
| <b>5P</b> | 1,058  | 221 |     | 80     |
| <b>6P</b> | 1,785  | 452 |     | 454    |
| <b>7P</b> | 3,595  | 388 |     | 2,004  |
| <b>8P</b> | 55,328 | 212 | 30  | 52,919 |
| <b>9P</b> | 47,610 | 78  | 749 | 45,021 |
| <b>2X</b> | 1,643  | 814 |     |        |
| <b>3X</b> | 1,356  | 606 |     |        |
| <b>4X</b> | 1,057  | 342 |     |        |
| <b>6X</b> | 1,252  | 114 |     |        |
| <b>7X</b> | 1,898  | 79  |     |        |

**Table S4.** Populations (a) and propensity scales (b) of the 95 ( $\varphi, \psi$ ) boxes containing at least 1000 residues in the dataset Data2.2.

Excel file TableS4.xls

**Table S5.** Average ( $\varphi, \psi$ ) values at the seven positions of  $\pi$ -helices of the dataset by Karplus PA and colleagues [29].

| <b>Position</b> | $\varphi$ (°) | $\psi$ (°) |
|-----------------|---------------|------------|
| <b>PI1</b>      | -64.2         | -41.0      |
| <b>PI2</b>      | -63.3         | -47.6      |
| <b>PI3</b>      | -71.5         | -37.9      |
| <b>PI4</b>      | -91.5         | -34.5      |
| <b>PI5</b>      | -110.5        | -52.9      |
| <b>PI6</b>      | -69.4         | -44.9      |
| <b>PI7</b>      | -64.9         | -38.4      |

**Table S6.** Pair-wise comparison of the propensity scales for the secondary structure elements ( $\alpha$ -helix (H), 3(10)-helix (G),  $\beta$ -sheet (E), and polyproline II (P)). The correlation coefficients R and the  $p$ -values are reported on the right and left side of the diagonal, respectively. The 18AA ensemble is considered.

|   | E      | G     | H     | P     |
|---|--------|-------|-------|-------|
| E |        | -0.73 | -0.27 | -0.23 |
| G | <0.001 |       | 0.12  | -0.05 |
| H | 0.28   | 0.65  |       | 0.59  |
| P | 0.36   | 0.83  | 0.01  |       |

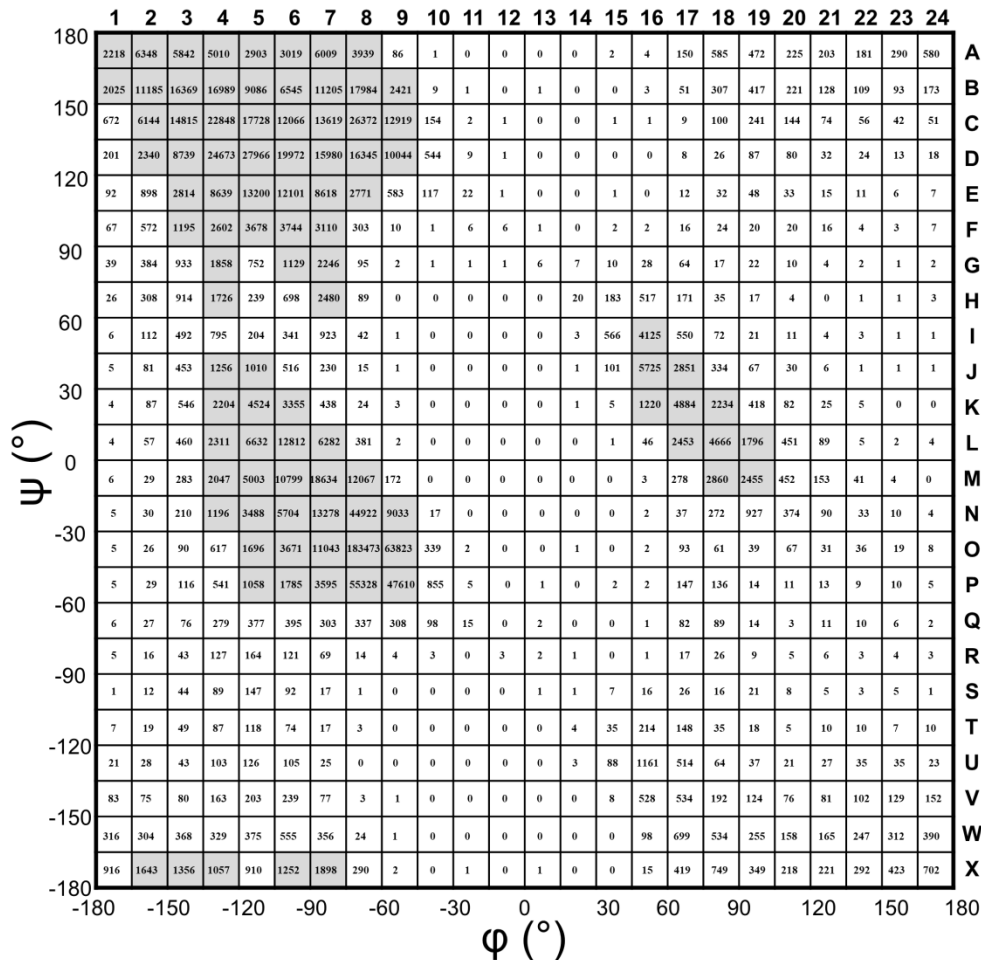

**Figure S1.** Populations (number of amino acid residues) of the 576 ( $\phi, \psi$ ) boxes of the Ramachandran plot in the dataset Data2.2. Boxes containing at least 1000 residues are colored in light grey. Although with a population >1000 residues, the 16U box has not been included in the study being an isolated box in the Ramachandran space.

| Residue | box 1A | Data2.2   | Propensity |
|---------|--------|-----------|------------|
| A       | 203    | 91,777    | 1.086      |
| V       | 1      | 81,244    | 0.006      |
| L       | 27     | 106,443   | 0.125      |
| I       | 2      | 66,707    | 0.015      |
| M       | 21     | 18,785    | 0.549      |
| K       | 43     | 56,584    | 0.373      |
| R       | 77     | 54,936    | 0.688      |
| Q       | 44     | 40,054    | 0.540      |
| E       | 45     | 66,055    | 0.335      |
| H       | 86     | 25,918    | 1.630      |
| S       | 325    | 63,476    | 2.515      |
| T       | 38     | 61,329    | 0.304      |
| W       | 38     | 17,806    | 1.048      |
| Y       | 105    | 43,721    | 1.180      |
| N       | 122    | 46,277    | 1.295      |
| D       | 128    | 61,317    | 1.025      |
| C       | 71     | 14,364    | 2.428      |
| F       | 133    | 48,764    | 1.340      |
| G       | 709    | 75,312    | 4.624      |
| P       | 0      | 48,599    | 0.000      |
| TOTAL   | 2,218  | 1,089,468 |            |

Example of calculation of the Chou-Fasman-like propensity of the Leucine (L) residue for the  $(\varphi, \psi)$  box 1A,  $P_{1A,L}$ :

Number of Leucine residues in the box 1A

Number of the 20 aminoacid residues in the box 1A

$$P_{1A,L} = \left( \frac{N_{1A,L}}{N_{Data2.2,L}} \right) / \left( \frac{\sum_{i=1}^{20} N_{1A,i}}{\sum_{i=1}^{20} N_{Data2.2,i}} \right) = \left( \frac{27}{106,443} \right) / \left( \frac{2,218}{1,089,468} \right) = 0.125$$

Number of Leucine residues in the dataset Data2.2

Number of the 20 aminoacid residues in the dataset Data2.2

**Figure S2.** Example of calculation of the Chou-Fasman-like propensity (see definition (2) in the Methods section) of a certain residue (i.e. Leucine) for a specific box (i.e. box 1A) of the Ramachandran plot.

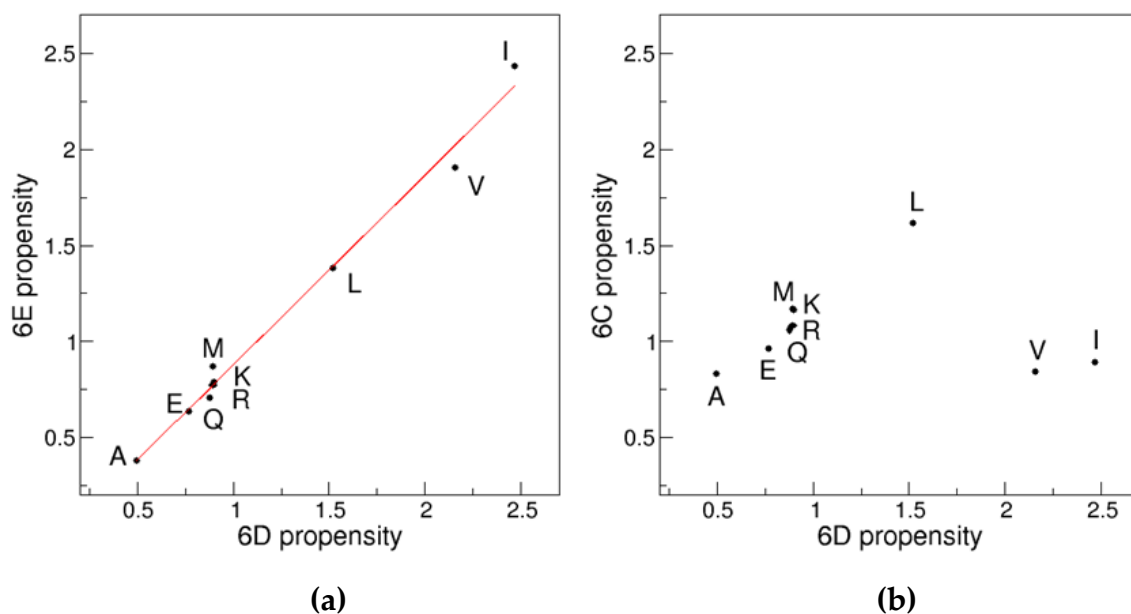

**Figure S3.** Comparison of the propensity scales of the 9AA for the couples of boxes (a) 6D-6E and (b) 6D-6C. For the 6D-6E pair the linear regression analysis yielded a correlation coefficient  $R = 0.995$  ( $p$ -value  $< 10^{-5}$ ).

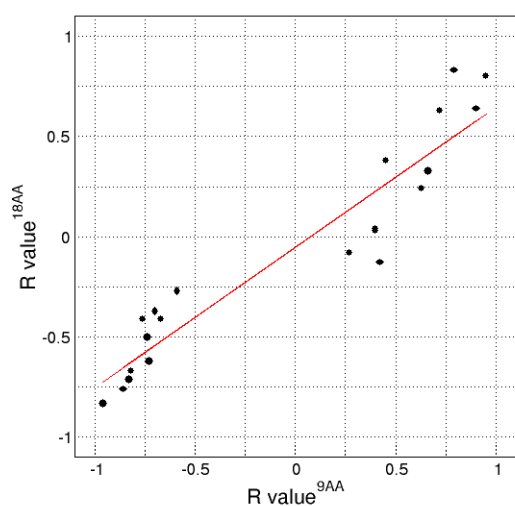

(a)

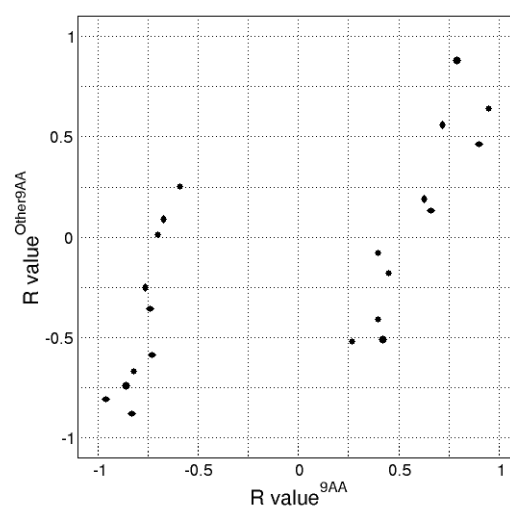

(b)

**Figure S4.** Correlation between the R values obtained for the same pair-wise comparison using (a) the 18AA and 9AA amino acid residue ensembles ( $R = 0.94$ ,  $p < 10^{-5}$ ) and (b) the 9AA and Other9AA ensembles.

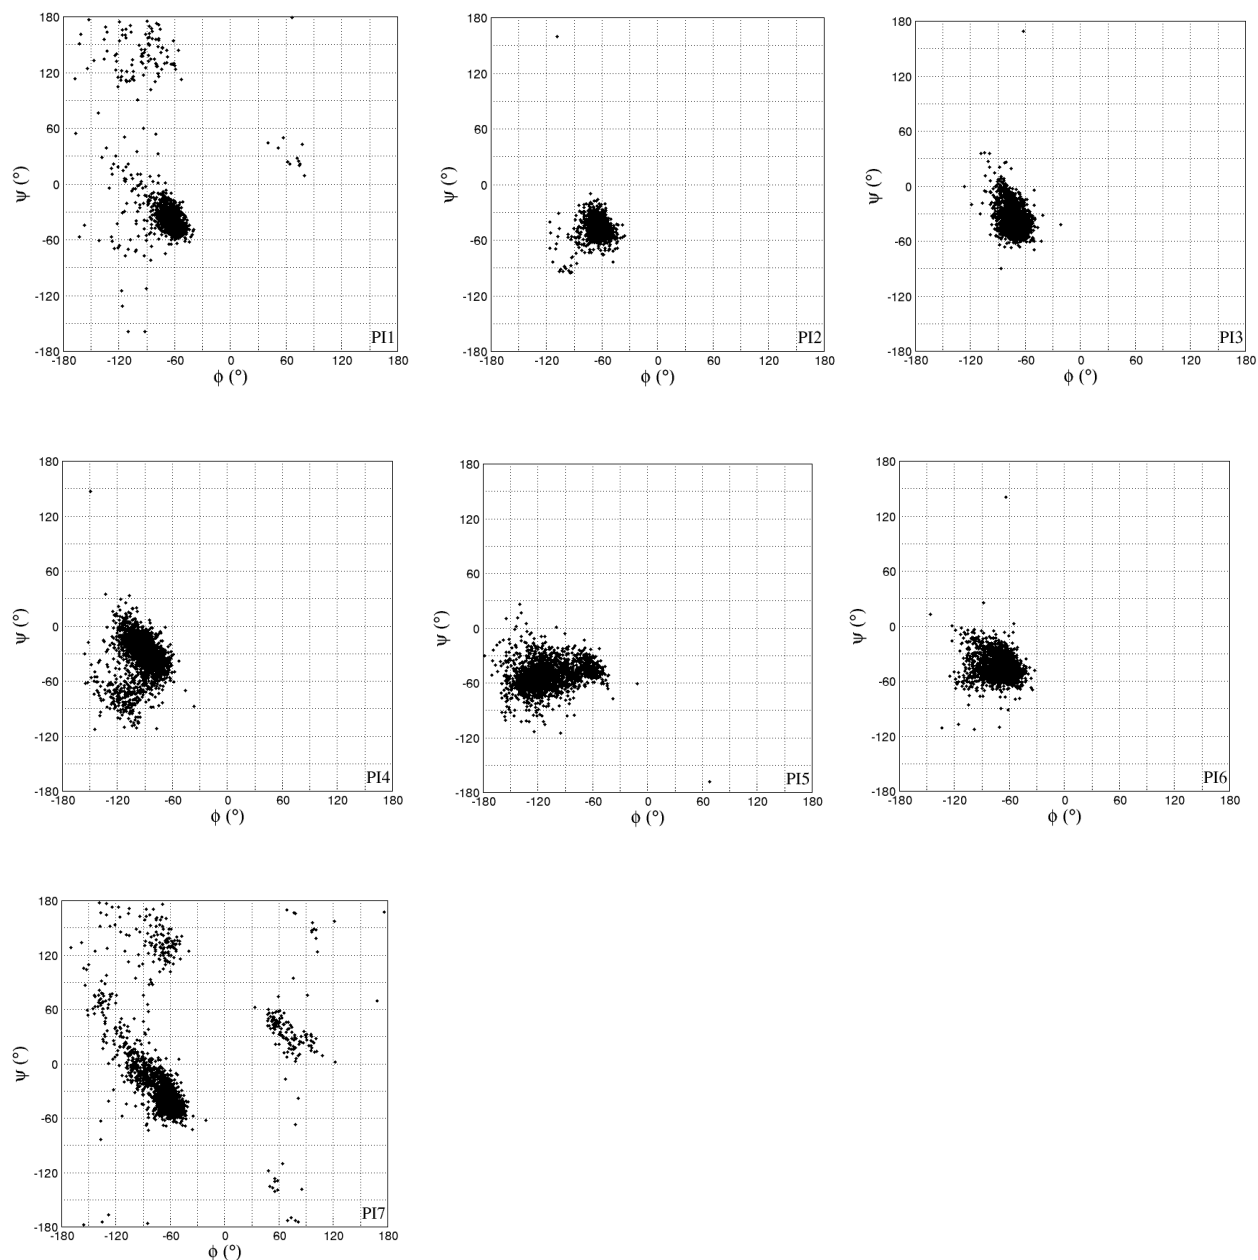

**Figure S5.** Ramachandran plots showing the conformation adopted by amino acid residues located at the seven positions of  $\pi$ -helices (PI1-PI7).

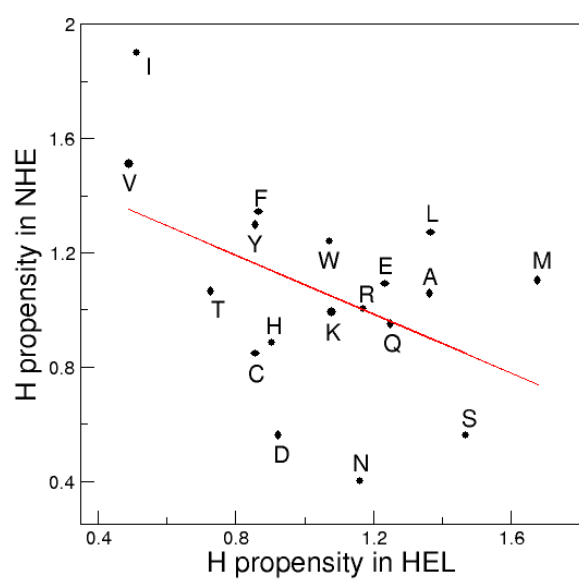

(a)

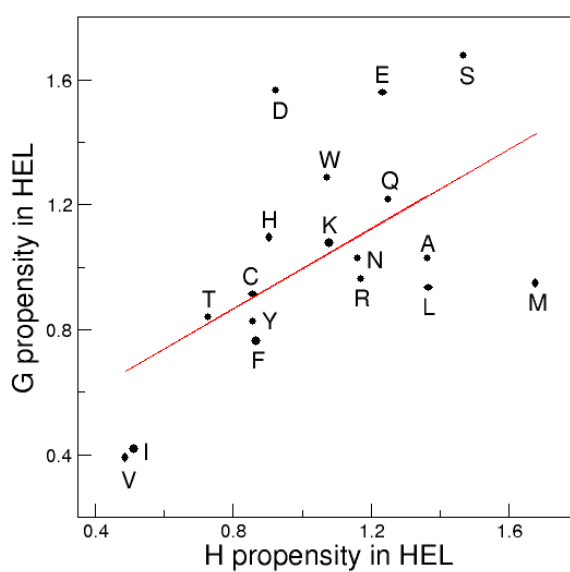

(b)

**Figure S6.** Significant correlations/anticorrelations of the propensity scales detected in the 18AA ensemble: **(a)** HEL\_H *versus* NHE\_H ( $R = -0.46$ ,  $p=0.055$ ), **(b)** HEL\_H *versus* HEL\_G ( $R = 0.59$ ,  $p=0.010$ ).

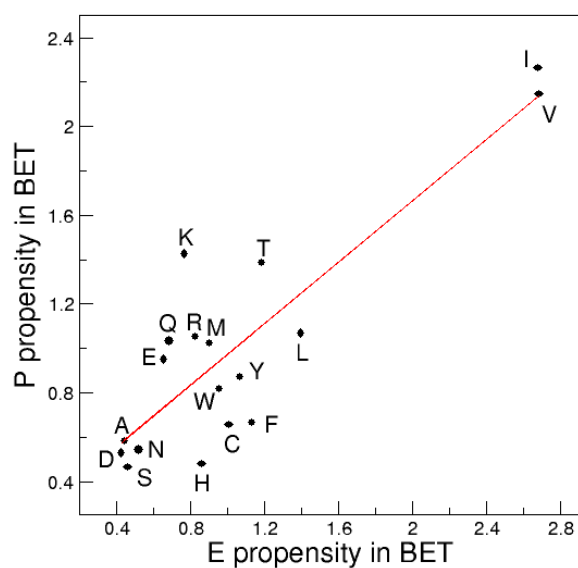

(a)

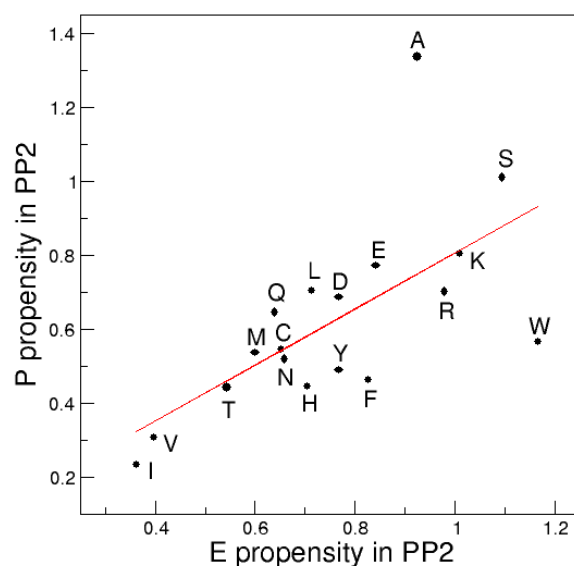

(b)

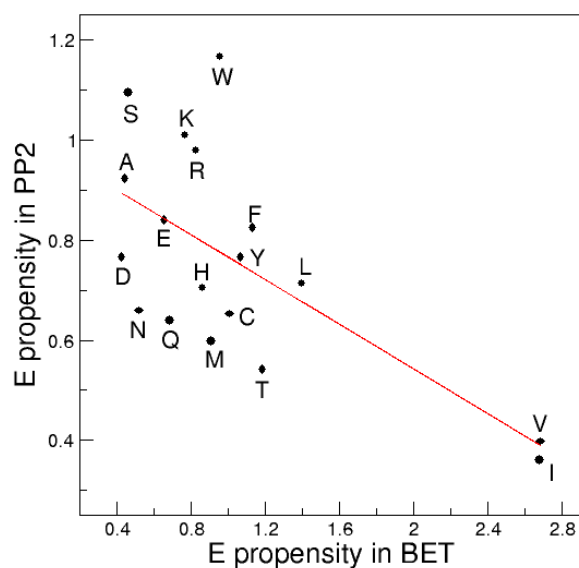

(c)

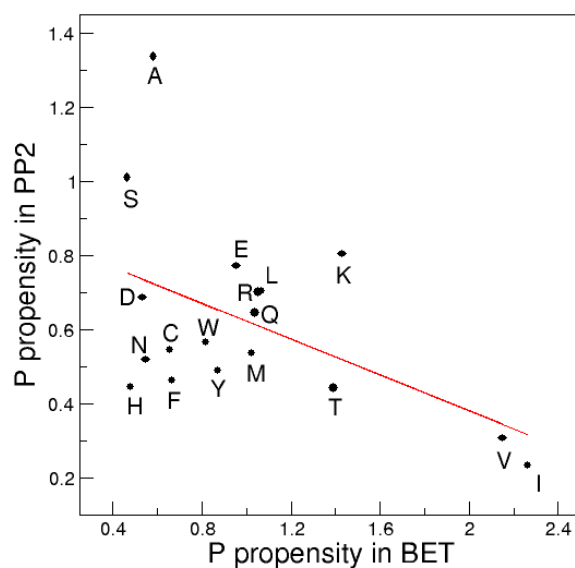

(d)

**Figure S7.** Significant correlations/anticorrelations of the propensity scales detected in the 18AA ensemble: (a) BET\_E *versus* BET\_P ( $R = 0.87$ ,  $p < 10^{-5}$ ), (b) PP2\_E *versus* PP2\_P ( $R = 0.66$ ,  $p = 0.0029$ ), (c) BET\_E *versus* PP2\_E ( $R = -0.66$ ,  $p = 0.0029$ ), and (d) BET\_P *versus* PP2\_P ( $R = -0.49$ ,  $p = 0.039$ ).

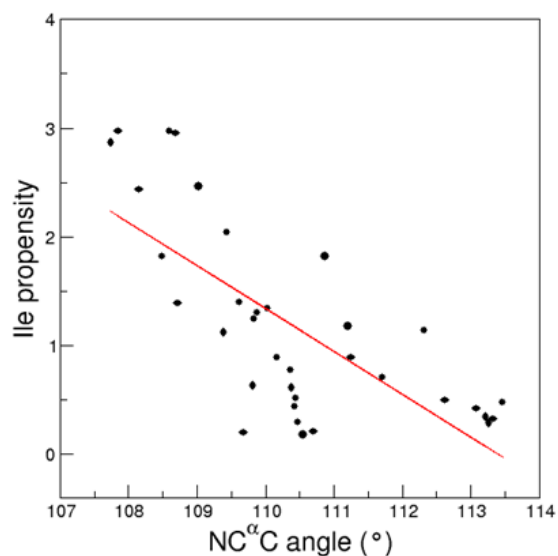

(a)

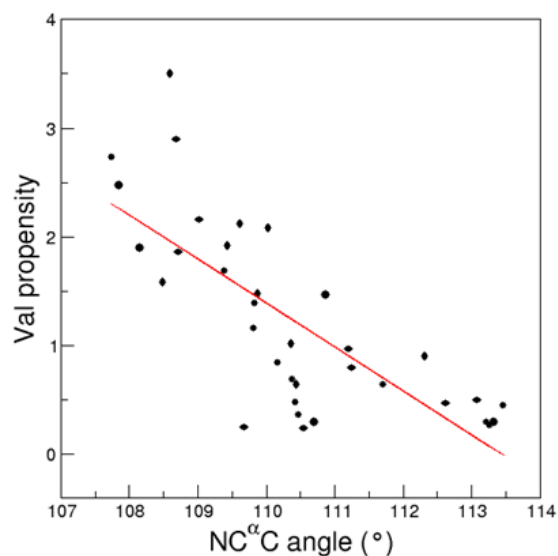

(b)

**Figure S8.** Propensities of (a) Ile and (b) Val residues as a function of the average value of the backbone bond angle  $\tau$  ( $\text{NC}^\alpha\text{C}$ ) of the  $(\varphi, \psi)$  boxes. Significant anticorrelations have been detected for both Ile ( $R = -0.72$ ,  $p < 10^{-5}$ ) and Val ( $R = -0.76$ ,  $p < 10^{-5}$ ) residues. Amino acid residue propensities and  $\text{NC}^\alpha\text{C}$  values are calculated in the datasets Data2.2 and Data1.6, respectively.
